# Supplementary material for: Liver RBFOX2 regulates cholesterol homeostasis via Scarb1 alternative splicing in mice
Source: PubMed Central journal article supplement (PMC9771820; doi:10.1038/s42255-022-00681-y), 2022-12-19
Supplement: 42255_2022_681_MOESM1_ESM.pdf [file 42255_2022_681_MOESM1_ESM.pdf]

## Reporting Summary

Nature Portfolio wishes to improve the reproducibility of the work that we publish. This form provides structure for consistency and transparency in reporting. For further information on Nature Portfolio policies, see our [Editorial Policies](#) and the [Editorial Policy Checklist](#).

### Statistics

For all statistical analyses, confirm that the following items are present in the figure legend, table legend, main text, or Methods section.

- | n/a                                 | Confirmed                                                                                                                                                                                                                                                                                      |
|-------------------------------------|------------------------------------------------------------------------------------------------------------------------------------------------------------------------------------------------------------------------------------------------------------------------------------------------|
| <input type="checkbox"/>            | <input checked="" type="checkbox"/> The exact sample size ( $n$ ) for each experimental group/condition, given as a discrete number and unit of measurement                                                                                                                                    |
| <input type="checkbox"/>            | <input checked="" type="checkbox"/> A statement on whether measurements were taken from distinct samples or whether the same sample was measured repeatedly                                                                                                                                    |
| <input type="checkbox"/>            | <input checked="" type="checkbox"/> The statistical test(s) used AND whether they are one- or two-sided<br><i>Only common tests should be described solely by name; describe more complex techniques in the Methods section.</i>                                                               |
| <input type="checkbox"/>            | <input checked="" type="checkbox"/> A description of all covariates tested                                                                                                                                                                                                                     |
| <input type="checkbox"/>            | <input checked="" type="checkbox"/> A description of any assumptions or corrections, such as tests of normality and adjustment for multiple comparisons                                                                                                                                        |
| <input type="checkbox"/>            | <input checked="" type="checkbox"/> A full description of the statistical parameters including central tendency (e.g. means) or other basic estimates (e.g. regression coefficient) AND variation (e.g. standard deviation) or associated estimates of uncertainty (e.g. confidence intervals) |
| <input type="checkbox"/>            | <input checked="" type="checkbox"/> For null hypothesis testing, the test statistic (e.g. $F$ , $t$ , $r$ ) with confidence intervals, effect sizes, degrees of freedom and $P$ value noted<br><i>Give <math>P</math> values as exact values whenever suitable.</i>                            |
| <input checked="" type="checkbox"/> | <input type="checkbox"/> For Bayesian analysis, information on the choice of priors and Markov chain Monte Carlo settings                                                                                                                                                                      |
| <input checked="" type="checkbox"/> | <input type="checkbox"/> For hierarchical and complex designs, identification of the appropriate level for tests and full reporting of outcomes                                                                                                                                                |
| <input checked="" type="checkbox"/> | <input type="checkbox"/> Estimates of effect sizes (e.g. Cohen's $d$ , Pearson's $r$ ), indicating how they were calculated                                                                                                                                                                    |

*Our web collection on [statistics for biologists](#) contains articles on many of the points above.*

### Software and code

Policy information about [availability of computer code](#)

- |                 |                                                                                                                                                                                                                                                                                                                                                                                                                                                                         |
|-----------------|-------------------------------------------------------------------------------------------------------------------------------------------------------------------------------------------------------------------------------------------------------------------------------------------------------------------------------------------------------------------------------------------------------------------------------------------------------------------------|
| Data collection | -RNAseq data was processed using RTA version 1.18.54, with default filter and quality settings. The reads were demultiplexed with CASAVA 2.17. Additional information is detailed in methods section. Tophat2 (2.0.11) was used for alignment. Lipidomics data acquisition was performed with Xcalibur software (version 4.1)                                                                                                                                           |
| Data analysis   | -R 3.6.1 was applied for the RNAseq analysis. rMATS 3.2.5 was applied for the pre-mRNA alternative splicing analysis. See methods section for additional details. The code corresponding to Fig. 1E-G and Fig. 3B,C is publicly available at the GitHub repository ( <a href="https://github.com/nebo56/RBFOX2-data_analysis">https://github.com/nebo56/RBFOX2-data_analysis</a> ). Both eCLIP and eiCLIP samples were aligned by STAR alignment tool (version 2.4.2a). |

For manuscripts utilizing custom algorithms or software that are central to the research but not yet described in published literature, software must be made available to editors and reviewers. We strongly encourage code deposition in a community repository (e.g. GitHub). See the Nature Portfolio [guidelines for submitting code & software](#) for further information.

### Data

Policy information about [availability of data](#)

All manuscripts must include a [data availability statement](#). This statement should provide the following information, where applicable:

- Accession codes, unique identifiers, or web links for publicly available datasets
- A description of any restrictions on data availability
- For clinical datasets or third party data, please ensure that the statement adheres to our [policy](#)

The data that support the findings are publicly available: RNA-seq (Fig. 1A-B; 1D; Ext. Fig. 1B; Ext. Fig. 1D-G and Ext. Fig. 3E) and eiCLIP (Fig. 3A-I, Ext. Fig. 3A-F) data

generated for this study have been deposited at GEO under accession number GSE151753. The mass spectrometry data (Fig. 1B-C; 2D; Ext. Fig. 1A; Ext. Fig. 1C) have been deposited to the ProteomeXchange Consortium via the PRIDE partner repository with the dataset identifier PXD036976. In addition, the full list of proteins identified across the experiments has been included in Supplementary Table 1.

## Human research participants

Policy information about [studies involving human research participants and Sex and Gender in Research](#).

|                             |                                             |
|-----------------------------|---------------------------------------------|
| Reporting on sex and gender | <input type="text" value="Not applicable"/> |
| Population characteristics  | <input type="text" value="Not applicable"/> |
| Recruitment                 | <input type="text" value="Not applicable"/> |
| Ethics oversight            | <input type="text" value="Not applicable"/> |

Note that full information on the approval of the study protocol must also be provided in the manuscript.

## Field-specific reporting

Please select the one below that is the best fit for your research. If you are not sure, read the appropriate sections before making your selection.

- Life sciences       Behavioural & social sciences       Ecological, evolutionary & environmental sciences

For a reference copy of the document with all sections, see [nature.com/documents/nr-reporting-summary-flat.pdf](https://www.nature.com/documents/nr-reporting-summary-flat.pdf)

## Life sciences study design

All studies must disclose on these points even when the disclosure is negative.

|                 |                                                                                                                                                                                                                                                                                                                                                                                                                                                                                                                                                                                                                                                                                                                        |
|-----------------|------------------------------------------------------------------------------------------------------------------------------------------------------------------------------------------------------------------------------------------------------------------------------------------------------------------------------------------------------------------------------------------------------------------------------------------------------------------------------------------------------------------------------------------------------------------------------------------------------------------------------------------------------------------------------------------------------------------------|
| Sample size     | <input type="text" value="No statistical method was applied to determine the sample size. Sample size used was based on our previous studies (e.g PMID: 35293570, PMID: 26947074 , PMID: 26910012, PMID: 25043817). The number of animals or independent experiments are indicated in figure legends."/>                                                                                                                                                                                                                                                                                                                                                                                                               |
| Data exclusions | <input type="text" value="No data were excluded, unless there is a failure in measurement."/>                                                                                                                                                                                                                                                                                                                                                                                                                                                                                                                                                                                                                          |
| Replication     | <input type="text" value="For mouse experiments, 7 to 10 samples per group were examined in one cohort, and experiments were replicated in an independent cohort. For the AAV-RBFOX2 DN and SSO in vivo treatments one cohort with the indicated number of mice was examined. RNAseq experiments were performed in a minimum of 4 samples per group. High-throughput proteomic (TMT/MS) analysis was performed in a minimum of 3 samples per group. Metabolomic analyses were performed in 5 to 6 samples per group. The other cell culture in vitro studies were performed in a minimum of 6 samples per group and experiments were replicated at least 3 times. In all data presented replication was successful."/> |
| Randomization   | <input type="text" value="Mice were randomly assembled into groups determined by sex, genotype or physiological state (for example starved). For in vitro studies, when possible, samples were randomly distributed across culture plates and randomly processed to prevent potential artifacts such as batch or edge effects."/>                                                                                                                                                                                                                                                                                                                                                                                      |
| Blinding        | <input type="text" value="Blinding was performed for a subset of experiments"/>                                                                                                                                                                                                                                                                                                                                                                                                                                                                                                                                                                                                                                        |

## Reporting for specific materials, systems and methods

We require information from authors about some types of materials, experimental systems and methods used in many studies. Here, indicate whether each material, system or method listed is relevant to your study. If you are not sure if a list item applies to your research, read the appropriate section before selecting a response.

### Materials & experimental systems

| n/a                                 | Included in the study                                           |
|-------------------------------------|-----------------------------------------------------------------|
| <input type="checkbox"/>            | <input checked="" type="checkbox"/> Antibodies                  |
| <input type="checkbox"/>            | <input checked="" type="checkbox"/> Eukaryotic cell lines       |
| <input checked="" type="checkbox"/> | <input type="checkbox"/> Palaeontology and archaeology          |
| <input type="checkbox"/>            | <input checked="" type="checkbox"/> Animals and other organisms |
| <input checked="" type="checkbox"/> | <input type="checkbox"/> Clinical data                          |
| <input checked="" type="checkbox"/> | <input type="checkbox"/> Dual use research of concern           |

### Methods

| n/a                                 | Included in the study                           |
|-------------------------------------|-------------------------------------------------|
| <input checked="" type="checkbox"/> | <input type="checkbox"/> ChIP-seq               |
| <input checked="" type="checkbox"/> | <input type="checkbox"/> Flow cytometry         |
| <input checked="" type="checkbox"/> | <input type="checkbox"/> MRI-based neuroimaging |

## Antibodies

### Antibodies used

The following antibodies were used in this study:

#### 1.- For western-blot

- Anti-RBFOX2 antibody; Bethyl Laboratories; A300-864A, lot #2. Dil 1:1000.
- Anti-Tubulin antibody; Santa cruz; sc-5286, lot #k0215. Dil 1:1000.
- Anti-SCARB1 antibody; Abcam (EP1556Y) and Invitrogen (PA3-16805). Dil 1:1000.
- Anti-SREBP1 antibody; Pharmigen; 557036. Dil 1:1000.
- Anti-vinculin antibody; Sigma; V9131. Dil 1:1000.
- Anti-ACC (C83B10) antibody; Cell signaling; 3676. Dil 1:1000.
- Anti-pS79 ACC (D7D11) antibody; Cell signaling; 11818. Dil 1:1000.
- Anti-FASN (C20G5) antibody; Cell signaling; 3180. Dil 1:1000.
- Anti-ABCA1 antibody; Invitrogen PA116789. Dil 1:1000.
- Anti-APOB antibody; Proteintech 20578-1-AP. Dil 1:1000.
- Anti-PLA2G6 antibody; Santa cruz; sc-166616, lot #1411. Dil 1:1000.

#### 2.-For IHF

- Anti-MRC1. Abcam; ab64693, lt #GR3266265-1. Dil 1:100.

### Validation

All the antibodies used in this study have been obtained from commercial sources. Validation of these antibodies for each application was performed in previous publications as indicated by the manufacturer:

- Anti-RBFOX2 antibody; Bethyl Laboratories; A300-864A. Validated for Human and Mouse for WB and iCLIP. doi: 10.1016/j.cell.2019.06.001; doi: 10.1038/s41467-018-04559-0
- Anti-Tubulin antibody; Santa cruz; sc-5286. Validated for Human and Mouse for WB. doi: 10.1016/j.molcel.2021.01.004
- Anti-SCARB1 antibody; Abcam (EP1556Y); Validated for WB. DOI: 10.7554/eLife.52551 and Invitrogen (PA3-16805). Validated for WB ([https://www.thermofisher.com/order/genome-database/dataSheetPdf?producttype=antibody&productsubtype=antibody\\_primary&productId=PA3-16805&version=251](https://www.thermofisher.com/order/genome-database/dataSheetPdf?producttype=antibody&productsubtype=antibody_primary&productId=PA3-16805&version=251))
- Anti-SREBP1 antibody; Pharmigen; 557036. Validated for WB. DOI: 10.1016/j.cell.2020.05.053
- Anti-vinculin antibody; Sigma; V9131. Validated for WB. DOI: 10.1038/s41467-022-33246-4
- Anti-ACC (C83B10) antibody; Cell signaling; 3676. Validated for WB. DOI: 10.1038/nm.3372
- Anti-pS79 ACC (D7D11) antibody; Cell signaling; 11818. Validated for WB. DOI: 10.1002/dmrr.997
- Anti-FASN (C20G5) antibody; Cell signaling; 3180. Validated for WB. DOI: 10.1016/j.humpath.2005.11.022
- Anti-ABCA1 antibody; Invitrogen PA116789. Validated for WB. DOI: 10.1038/s41419-021-03544-8
- Anti-APOB antibody; Proteintech 20578-1-AP. Validated for WB. DOI: 10.5009/gnl19115
- Anti-PLA2G6 antibody; Santa cruz; sc-166616. Validated for WB. doi: 10.1007/s10620-015-3807-5; doi: 10.1194/jlr.RA119000281.
- Anti-MRC1. Abcam; ab64693. Validated for Mouse IF applications. doi: 10.1016/j.ccell.2019.12.003

## Eukaryotic cell lines

Policy information about [cell lines and Sex and Gender in Research](#)

### Cell line source(s)

Hepa 1-6 [Hepa1-6] (ATCC® CRL-1830); AML12 (ATCC® CRL-2254); Hek293 (ATCC® CRL-1573), CGT-RCiB-10 (Cell & Gene Therapy Catapult, London, U.K.)

### Authentication

Cell lines were obtained from the providers and were authenticated by the providers. No further authentication was performed.

### Mycoplasma contamination

Absence of mycoplasma is tested in a monthly basis.

### Commonly misidentified lines (See [ICLAC](#) register)

No commonly misidentified lines were used in this study.

## Animals and other research organisms

Policy information about [studies involving animals; ARRIVE guidelines](#) recommended for reporting animal research, and [Sex and Gender in Research](#)

### Laboratory animals

C57BL6/J (stock number 000664), Rbfox2loxP/loxP (stock number 014090) and Albumin-cre (stock number 003574) were obtained from the Jackson Laboratory (<https://www.jax.org>). 8-week old male and female mice were used. Mice were housed in pathogen-free barrier facilities under a 12 hour light/dark cycle at 22°C with controlled humidity and free access to food and water. See methods for additional information.

### Wild animals

The study did not involve wild animals

### Reporting on sex

Sex was specified in each experiment

### Field-collected samples

The study did not involve samples collected in the field

Ethics oversight

All in vivo work was approved by the animal welfare and ethical review board at Imperial College London and in accordance with the United Kingdom Animals (Scientific Procedures) Act (1986).

Note that full information on the approval of the study protocol must also be provided in the manuscript.
