# Supplementary material for: Liver RBFOX2 regulates cholesterol homeostasis via Scarb1 alternative splicing in mice
Source: PubMed Central journal article supplement (PMC9771820; doi:10.1038/s42255-022-00681-y), 2022-12-19
Supplement: 42255_2022_681_MOESM26_ESM.pdf [file 42255_2022_681_MOESM26_ESM.pdf]

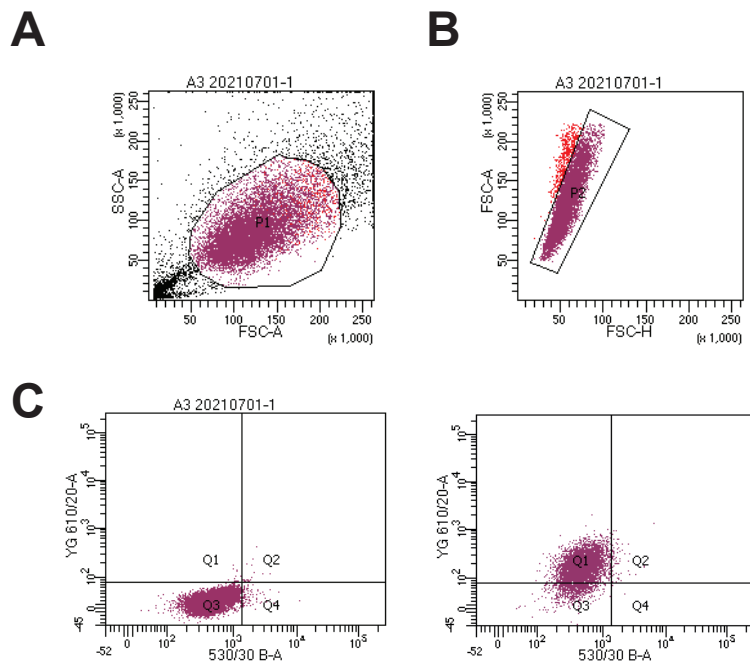

A.-Live cells were gated by plotting forward scatter against side scatter. B.- Doublets were excluded by plotting forward scatter area against forward scatter height. C.- GFP was excited by a 488nm laser and emission collected using 530/30nm band pass filter. DIL was excited by a 561nm laser and emission collected using 610/20nm band pass filter. Samples were analysed in a BD facs aria III cytometer using BD FACSDiva 9.0.1 software.
